# Supplementary material
Source: PubMed Central journal article supplement (PMC3101000)
Supplement: 1104686108_pnas.201104686SI.pdf [file 1104686108_pnas.201104686SI.pdf]

# Supporting Information

Molina et al. 10.1073/pnas.1104686108

## SI Text

**DNA Extraction and Sequencing.** DNA was extracted using a modified cetyl trimethylammonium bromide (CTAB) protocol (1), and the resequencing strategy consisted of PCR amplification and direct sequencing of ~500-bp fragments from protein-coding genes spaced at ~100-kb intervals on chromosomes 8, 10, and 12. Primers were anchored in exons and designed to span introns using Primer 3 (2) based on the Nipponbare reference genome (Rice Genome Annotation Project v. 6.0) (3). PCR amplification and sequencing were conducted by Cogenics, and subsequent editing was performed in a semiautomated process that incorporated Phred/Phrap (4, 5) for contig assembly and quality scoring and PolyPhred (6) for identification of heterozygotes. All PolyPhred quality scores <25 were assigned as ambiguous. Heterozygote base calls were checked, and International Union of Pure and Applied Chemistry (IUPAC) degenerate symbols were incorporated where appropriate. Multiple sequence alignments were generated with MUSCLE (7), and singletons and triallelic SNPs in the alignments were confirmed. Data is available at [http://puruggananlab.bio.nyu.edu/Rice\\_data/](http://puruggananlab.bio.nyu.edu/Rice_data/).

**Population Stratification and Summary Diversity Measures.** The memberships of landrace accessions were evaluated by population structure analysis using Structure v.2.3.1 (8) on a subset of the SNP data using the procedure described in Caicedo et al. (9) but with a longer run length (300-k iterations; 100 k as burn-in) for each replicate. Summary population genetic statistics (10–12) were computed using the libsequence package (13).

**Selection Mapping.** We used two different methods to map selective sweeps related to rice domestication from *Oryza rufipogon* based on local reductions in diversity and the multipopulation allele frequency spectrum (AFS) used in the demographic inference.

**Local reduction in diversity.** To identify regions showing a local reduction in genetic diversity, we calculated the nucleotide diversity for each sequenced fragment. Nucleotide diversity was calculated as (Eq. S1)

$$\hat{\theta}_\pi = \sum_{i=1}^S \left( 1 - \sum_{j=1}^2 \frac{k_{ij}(k_{ij}-1)}{n_i(n_i-1)} \right), \quad [\text{S1}]$$

where  $S$  is the number of segregating sites found in the fragment,  $k_{ij}$  is the count of allele  $j$  at site  $i$ , and  $n_i$  is the sample size for site  $i$ . Regions where there are  $k$  consecutive markers with  $\theta_\pi = 0$  correspond to runs of monomorphic fragments with run length  $k$  ( $k \geq 1$ ). From those, candidate regions were defined as regions where the total run length is in the top 5% of run lengths from the empirical distribution for the respective population (Fig. S2); this corresponded to a run length of four for *indica* and run length of eight for tropical *japonica*. We allowed for gaps of low variation in a candidate region by merging runs if they were separated by a fragment with only one segregating site.

**Multipopulation AFS.** We use the multipopulation AFS to derive a measure of how well the observed distribution of allele frequencies at a particular locus (the local AFS) fits the expected distribution derived from the AFS of the full dataset (the global AFS). The method is similar to the G2D test of Nielsen et al. (14), with two notable differences. First, we include all three study populations (i.e., our AFS is 3D), and second, we use a Poisson likelihood to calculate the composite likelihood ratio by modeling the expected entries of the AFS as independent Poisson variables (15).

For a given region of interest, we first obtain the local AFS  $X = (X_1, X_2, \dots, X_n)$ , where  $X_i$  is the count of alleles for the  $i$ th

category in the 3D AFS and  $n$  is the total number of categories. The categories correspond to the cells of the 3D matrix that makes up the AFS. For the following calculations, we consider all categories except sites that are fixed for the ancestral allele in all three populations [i.e., the entry  $a(0,0,0)$  in the AFS]. Missing data are treated as in the demographic inference by removing sites with too few samples in each population and projecting down sites with larger sample sizes. Assuming that each entry in the AFS is an independent Poisson variable, a composite Poisson likelihood of the data can be calculated as (Eq. S2)

$$CL(X) = \prod_{i=1}^n \frac{e^{-\lambda_i} \lambda_i^{X_i}}{X_i!}. \quad [\text{S2}]$$

We can then form a composite likelihood ratio (CLR) test comparing the observed local AFS to the expected local AFS as (Eq. S3)

$$CLR = \log \frac{\Pr(\text{Data} | H_A)}{\Pr(\text{Data} | H_0)} = \log \frac{CL(X | X_{\text{observed}})}{CL(X | X_{\text{expected}})}. \quad [\text{S3}]$$

Substituting Eq. S2 into Eq. S3 results in (Eq. S4)

$$CLR = \sum_{i=1}^n \left( (-\lambda_{i,\text{expected}} + \lambda_{i,\text{observed}}) + X_i \cdot \log \frac{\lambda_{i,\text{observed}}}{\lambda_{i,\text{expected}}} \right). \quad [\text{S4}]$$

Because  $E[X_i] = \lambda_i$ , we set  $\lambda_{i,\text{expected}} = E[X_{i,\text{expected}}]$  and  $\lambda_{i,\text{observed}} = E[X_{i,\text{observed}}] = X_i$ .

The expected entries for each category  $E[X_{i,\text{expected}}]$  can be estimated by using (Eq. S5)

$$E[X_{i,\text{expected}}] = \theta_{\text{region}} \cdot \Pr(X_i) \quad [\text{S5}]$$

[i.e., by distributing the total number of expected mutations at a particular locus according to their probability of observing them in a particular category  $\Pr(X_i)$ ]. We obtain this probability from the AFS of the full dataset by (Eq. S6)

$$\Pr(X_i) = \frac{X_{i,\text{full}}}{\sum X_{i,\text{full}}}. \quad [\text{S6}]$$

For the expected number of mutations in the region  $\theta_{\text{region}}$ , we estimated the per base pair estimate of the population mutation rate  $\theta_W$  from the sites observed in *O. rufipogon* in that region using Watterson's estimator (see below). For a particular locus, we then obtain (Eq. S7)

$$\theta_{\text{region}} = \theta_W \cdot N_{\text{sites}}, \quad [\text{S7}]$$

where  $N_{\text{sites}}$  is the total number of sites with nonmissing data in the region. This leads to our final test statistic (Eq. S8)

$$CLR = \sum_{i=1}^n \left( \theta_{\text{region}} \cdot \Pr(X_i) + X_{i,\text{observed}} \cdot \left( \log \frac{X_{i,\text{observed}}}{\theta_{\text{region}} \cdot \Pr(X_i)} - 1 \right) \right). \quad [\text{S8}]$$

This statistic measures how well the data from a locus fits what would be expected for that locus, taking into account the observed genome-wide distribution of allele frequencies (i.e., demography) as well as the background mutation rate estimated from *O. rufipogon*.

As in Nielsen et al. (14), the method is sensitive to any deviation from the neutral expectation.

The CLR was calculated for each fragment, and empirical  $P$  values were assigned from the distribution of all CLR scores. To limit our results to regions with evidence for a selective sweep, we defined candidate regions as regions with a high CLR score combined with low diversity in at least one of the domesticated species. The cutoffs we used were an empirical CLR  $P$  value  $\leq 0.1$  as well as the number of segregating sites  $S \leq 1$  in either *indica* or tropical *japonica*.

**Demographic Modeling. SNP pruning for *delta*.** Because our accessions were inbred lines, we randomly sampled one of two alleles for each individual, resulting in a dataset containing a total of 7,059 SNPs that were segregating in at least one population among *O. rufipogon*, *indica*, and tropical *japonica*. SNPs were then polarized using information from two outgroup species *O. meridionalis* and *O. barthii*, and for each SNP, we assigned the ancestral allele if at least one of the outgroup species matched one of the observed alleles in the data. To include only putatively neutral SNPs in the demographic inference, we only used noncoding and silent coding SNPs for the analysis, additionally removing all SNPs that were located in splice sites as well as UTR regions and those located in putative transposon regions. Furthermore, we included only SNPs that had nonmissing data in at least 13 *O. rufipogon*, 19 *indica* individuals, and 14 tropical *japonica* individuals, resulting in a total of 2,057 segregating sites in the AFS. For those sites where the sample sizes were larger, we performed a hypergeometric projection down to 13, 19, and 14 individuals, respectively, to generate a single AFS for numerical inference. After the projection, the final site frequency spectra used for the analysis contained 1,848 segregating sites, of which 1,574, 613, and 374 were segregating in *O. rufipogon*, *indica*, and tropical *japonica* populations, respectively.

**Modeling.** In each model, we modeled a Wright–Fisher ancient population of *O. rufipogon* that split, leading to a two-population epoch for  $\tau_{2B} + \tau_2$ -scaled generations, where  $\tau_{2B}$  is the duration of the bottleneck and  $\tau_2$  is the length of time after the bottleneck and before the next population split. During these periods, the population size of the second species is  $\eta_{1B} \times N_{\text{ruffi}}$  and  $\eta_1 \times N_{\text{ruffi}}$  during and after the bottleneck, respectively. After the second population split, a three-population epoch extends for  $\tau_B + \tau$ -scaled generations, where the population size of the second species remains at  $\eta_1 \times N_{\text{ruffi}}$  and the population size of the third is  $\eta_{2B} \times N_{\text{ruffi}}$  for  $\tau_B$  generations and  $\eta_2 \times N_{\text{ruffi}}$  for  $\tau$ . Because bottleneck population size and bottleneck time are confounding variables, we fixed  $\eta_{1B}$  and  $\eta_{B2}$  to be 0.01 and inferred the severity of the bottleneck from the maximum likelihood estimates of  $\tau_B$  and  $\tau_{2B}$ .

In addition to estimating population size in contemporary *indica* and tropical *japonica*, we also allowed for migration during the final  $T$ -scaled generations of the model. Because Caicedo

et al. (9) found no evidence for migration from *O. rufipogon* into *indica* and tropical *japonica*, we tested this scenario (no migration from *rufipogon*) along with three additional migration scenarios—no migration, symmetric migration, and asymmetric migration. Finally, to ensure that selective sweeps were not influencing our results from the demographic inference, we removed regions of the genome that were potentially under positive selection from the results of the selective sweep mapping and reanalyzed the demographic models with this AFS. We also inferred putative selective sweeps by applying the multipopulation CLR (XP-CLR) method, which is based on the expected patterns of population differentiation resulting from a selective sweep (16). However, it was unclear to what extent both the lack of a fine-scale recombination map as well as the type of the data (short resequenced unlinked fragments of highly inbred samples) affect this test, and therefore, they were excluded from the selective sweep results. In reanalyzing the demographic models without the sweeps, we did include those regions, which is a more conservative approach because a larger proportion of the data is excluded.

**Estimating Effective Population Size.** We estimated the effective population size for *O. rufipogon* by the population mutation rate  $\theta = 4N_e\mu$ . We used *O. meridionalis* as an outgroup, assuming a divergence time of  $T_{\text{Div}} = 2$  Myr (17). We also estimated the mutation rate by the number of observed substitutions between *O. rufipogon* and *O. meridionalis* as  $\mu = 3.34 \times 10^{-4}$  mutations per y over all sites or  $3.83 \times 10^{-9}$  per bp per generation, assuming a generation time of 1 y. From the total number of segregating sites, we can then estimate  $\theta$ , and substituting into  $\theta = 4N_e\mu$ , we obtain the current effective population size  $N_e$  as 456,339 for *O. rufipogon*, 39,701 for *indica*, and 26,924 for tropical *japonica*. Alternatively, we can also fix the neutral substitution rate to  $6.5 \times 10^{-9}$  as previously reported (18). This leads to a slightly lower estimate for *O. rufipogon* of 268,715, with *indica* at 23,378 and tropical *japonica* at 15,854.

**Phylogenetic Analyses.** After discarding burn-in in the \*BEAST analyses, we combined results from two independent runs of 50 million Markov Chain Monte Carlo (MCMC) chains each, sampling every 1,000th chain, and assessed convergence (i.e., both runs reaching the desired posterior distribution) with the program Tracer (19). The tree with the highest clade posterior probabilities (pp) was visualized using TreeAnnotator, which also outputs the clade pp and divergence times (i.e., mean ages taken from the entire sample of trees for that clade). To determine how *O. rufipogon* population structure would affect the multispecies coalescent (MSC) analysis, we also classified the wild rice accessions in the Yu et al. (20) dataset into India/Indochina and China groups based on the geographic regions described by Londo et al. (21).

- Doyle JJ, Doyle JL (1989) Isolation of plant DNA from fresh tissue. *Focus* 12:13–15.
- Rozen S, Skaletsky H (2000) Primer3 on the WWW for general users and for biologist programmers. *Methods Mol Biol* 132:365–386.
- Ouyang S, et al. (2007) The TIGR Rice Genome Annotation Resource: Improvements and new features. *Nucleic Acids Res* 35:D883–D887.
- Ewing B, Hillier L, Wendt MC, Green P (1998) Base-calling of automated sequencer traces using phred. I. Accuracy assessment. *Genome Res* 8:175–185.
- Green P (1999) *Documentation for Phrap and Cross\_match* (version 0.990319). Available at <http://www.phrap.org/phredphrap/phrap.html>. Accessed December 26, 2010.
- Nickerson DA, Tobe VO, Taylor SL (1997) PolyPhred: Automating the detection and genotyping of single nucleotide substitutions using fluorescence-based resequencing. *Nucleic Acids Res* 25:2745–2751.
- Edgar RC (2004) MUSCLE: Multiple sequence alignment with high accuracy and high throughput. *Nucleic Acids Res* 32:1792–1797.
- Falush D, Stephens M, Pritchard JK (2003) Inference of population structure using multilocus genotype data: Linked loci and correlated allele frequencies. *Genetics* 164:1567–1587.
- Caicedo AL, et al. (2007) Genome-wide patterns of nucleotide polymorphism in domesticated rice. *PLoS Genet* 3:1745–1756.
- Nei M (1987) *Molecular Evolutionary Genetics* (Columbia University Press, New York).
- Watterson GA (1975) On the number of segregating sites in genetical models without recombination. *Theor Popul Biol* 7:256–276.
- Tajima F (1989) Statistical method for testing the neutral mutation hypothesis by DNA polymorphism. *Genetics* 123:585–595.
- Thornton K (2003) Libsequence: A C++ class library for evolutionary genetic analysis. *Bioinformatics* 19:2325–2327.
- Nielsen R, et al. (2009) Darwinian and demographic forces affecting human protein coding genes. *Genome Res* 19:838–849.
- Sawyer SA, Hartl DL (1992) Population genetics of polymorphism and divergence. *Genetics* 132:1161–1176.
- Chen H, Patterson N, Reich DE (2010) Population differentiation as a test for selective sweeps. *Genome Res* 20:393–402.
- Zhu Q, Ge S (2005) Phylogenetic relationships among A-genome species of the genus *Oryza* revealed by intron sequences of four nuclear genes. *New Phytol* 167:249–265.
- Gaut BS, Morton BR, McCaig BC, Clegg MT (1996) Substitution rate comparisons between grasses and palms: Synonymous rate differences at the nuclear gene *Adh* parallel rate differences at the plastid gene *rbcl*. *Proc Natl Acad Sci USA* 93:10274–10279.
- Drummond AJ, Rambaut A (2007) BEAST: Bayesian evolutionary analysis by sampling trees. *BMC Evol Biol* 7:214.

20. Yu G, Olsen KM, Schaal BA (2011) Molecular evolution of the endosperm starch synthesis pathway genes in rice (*Oryza sativa* L.) and its wild ancestor, *O. rufipogon* L. *Mol Biol Evol* 28:659–671.

21. Londo JP, Chiang YC, Hung KH, Chiang TY, Schaal BA (2006) Phylogeography of Asian wild rice, *Oryza rufipogon*, reveals multiple independent domestications of cultivated rice, *Oryza sativa*. *Proc Natl Acad Sci USA* 103:9578–9583.

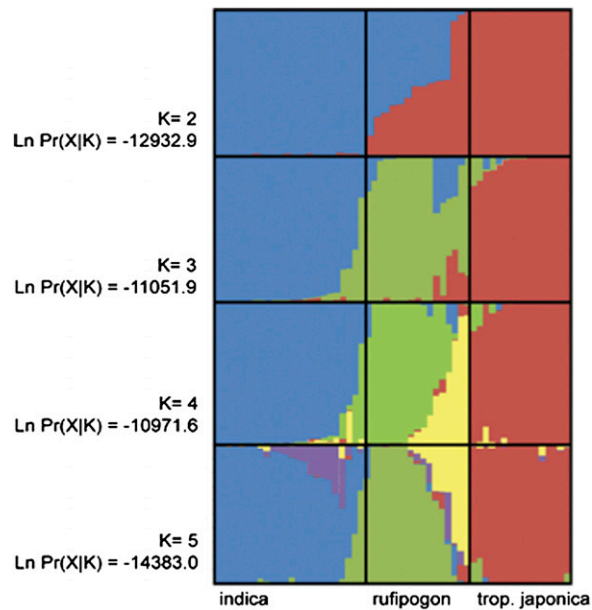

**Fig. S1.** Structure analysis. Model-based clustering analysis with STRUCTURE was used to identify population substructure and verify group membership of accessions. Using the method by Evanno et al. (1) to detect the correct number of clusters ( $K$ ),  $\delta K$  increased at  $K = 2$ , wherein *O. rufipogon* accessions are shown as an admixture of alleles of the two domesticated subspecies. However,  $\delta K$  was highest at  $K = 4$ , which splits the accessions into *indica*, tropical *japonica*, and two *O. rufipogon* clusters. However, there was only a marginal difference between  $K = 3$  and  $K = 4$ . Substructure within *O. rufipogon* cannot be explained by geographic partitions.

1. Evanno G, Regnaut S, Goudet J (2005) Detecting the number of clusters of individuals using the software STRUCTURE: a simulation study. *Mol Ecol* 14:2611–2620.

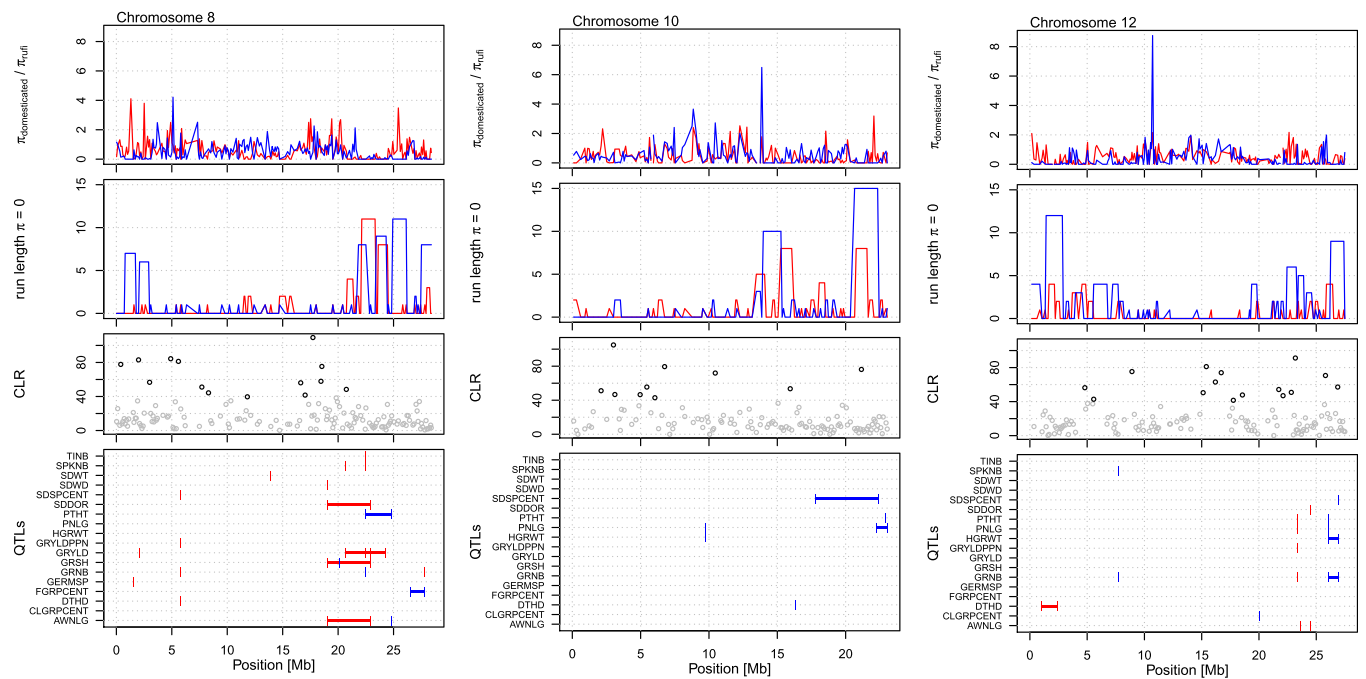

**Fig. S2.** Summary of selective sweep mapping results for chromosomes 8, 10, and 12. The x axis is the position along the chromosome. Results for different subspecies are indicated in red for *indica* and blue for tropical *japonica*. The ratio of nucleotide diversity in domesticates vs. wild rice is shown in the first row. Run length of consecutive monomorphic fragments is shown in the second row. CLR score for selective sweep mapping is shown in the third row. Plot symbols with darker shading indicate windows with empirical  $P \leq 0.1$ . Quantitative trait locus (QTL) regions associated with putative selective sweeps are shown in the fourth row. Plotted are the extents of QTL regions with size < 5 Mb involving either crosses of *O. rufipogon* and *O. sativa* ssp. *indica* (red) or tropical *japonica* (blue). QTL data is taken from [www.gramene.org](http://www.gramene.org). AWWNLG, awn length; CLGRPCENT, colored grain percentage; DTHD, days to heading; FGRPCENT, filled grain percentage; GERMSP, germination speed; GRNB, grain number; GRSH, grain shattering; GRYLD, grain yield; GRYLDPPN, grain yield per panicle; HGRWT, 100-grain weight; PNLG, panicle length; PHT, plant height; SDDOR, seed dormancy; SDSPCENT, seed set percent; SDWD, seed width; SPKNB, spikelet number; TINB, tiller number.







**Table S1. Accession information**

| Taxon                     | Country of origin         | IRGC   | GRIN      | Other no. | Variety name        |
|---------------------------|---------------------------|--------|-----------|-----------|---------------------|
| <i>Oryza barthii</i>      | Chad                      | 104119 | —         | RA2740    | —                   |
| <i>Indica</i>             | Thailand                  | 5803   | —         | —         | Pin kaoe            |
| <i>Indica</i>             | India                     | 6663   | —         | —         | Mudgo               |
| <i>Indica</i>             | Sri Lanka                 | 7755   | —         | —         | Kalukantha          |
| <i>Indica</i>             | Taiwan                    | 8240   | —         | —         | Hsia-chioh-keh-tu   |
| <i>Indica</i>             | Sri Lanka                 | 8952   | PI 584605 | RA4911    | Rathuwee            |
| <i>Indica</i>             | Loas                      | 12995  | —         | —         | I moume             |
| <i>Indica</i>             | Cambodia                  | 22796  | —         | —         | Damnoeub ansang     |
| <i>Indica</i>             | Thailand                  | 27748  | —         | —         | Khao dawk mali-105  |
| <i>Indica</i>             | Indonesia (S. Sumatra)    | 43369  | —         | —         | Cere air            |
| <i>Indica</i>             | Indonesia (E. Kalimantan) | 43545  | —         | —         | Popot-165           |
| <i>Indica</i>             | India/Bangladesh          | 45011  | —         | RA4991    | Badkalamakati       |
| <i>Indica</i>             | India                     | 46202  | —         | —         | Lalaman             |
| <i>Indica</i>             | China                     | 51250  | PI 584576 | —         | Ai-chiao-hong       |
| <i>Indica</i>             | China                     | 51300  | PI 584577 | —         | Guan-yin-tsan       |
| <i>Indica</i>             | China                     | 51400  | PI 584578 | —         | Pao-tou-hung        |
| <i>Indica</i>             | Vietnam                   | 56036  | —         | —         | Chau                |
| <i>Indica</i>             | Philippines               | 66970  | —         | —         | Ir64                |
| <i>Indica</i>             | Taiwan                    | —      | PI 279131 | RA 5344   | Deegeowoogen        |
| <i>Indica</i>             | Philippines               | —      | PI 280681 | RA5374    | Taducan             |
| <i>Indica</i>             | China                     | —      | —         | RA5531    | 93-11               |
| <i>Oryza meridionalis</i> | Australia                 | 101148 | —         | RA2661    | —                   |
| <i>Oryza nivara</i>       | Nepal                     | 105706 | —         | —         | —                   |
| <i>Oryza rufipogon</i>    | Thailand                  | 100904 | —         | —         | —                   |
| <i>Oryza rufipogon</i>    | China                     | 100916 | —         | —         | —                   |
| <i>Oryza rufipogon</i>    | China                     | 104620 | —         | W1952     | —                   |
| <i>Oryza rufipogon</i>    | China                     | 104621 | —         | W1953(-3) | —                   |
| <i>Oryza rufipogon</i>    | China                     | 104624 | —         | W1956(-2) | —                   |
| <i>Oryza rufipogon</i>    | China                     | 104625 | —         | W1957     | —                   |
| <i>Oryza rufipogon</i>    | China                     | 104629 | —         | RA4790    | —                   |
| <i>Oryza rufipogon</i>    | India                     | 105711 | —         | —         | Kozhinelli          |
| <i>Oryza rufipogon</i>    | Cambodia                  | 105720 | —         | —         | —                   |
| <i>Oryza rufipogon</i>    | Thailand                  | 105855 | —         | —         | Khao nok            |
| <i>Oryza rufipogon</i>    | Bangladesh                | 105888 | —         | —         | Uri                 |
| <i>Oryza rufipogon</i>    | Bangladesh                | 105898 | —         | —         | Uri dan             |
| <i>Oryza rufipogon</i>    | India                     | 106057 | —         | —         | Balunga             |
| <i>Oryza rufipogon</i>    | India                     | 106086 | —         | —         | Uri dan             |
| <i>Oryza rufipogon</i>    | India                     | 106103 | —         | —         | —                   |
| <i>Oryza rufipogon</i>    | Laos                      | 106163 | —         | —         | —                   |
| <i>Oryza rufipogon</i>    | Vietnam                   | 106166 | —         | —         | Khao noc pit        |
| <i>Oryza rufipogon</i>    | Vietnam                   | 106168 | —         | —         | —                   |
| <i>Oryza rufipogon</i>    | Indonesia                 | 106453 | —         | —         | —                   |
| <i>Oryza rufipogon</i>    | Papua New Guinea          | 106523 | —         | —         | —                   |
| Tropical <i>japonica</i>  | Philippines               | 328    | —         | RA5535    | Azucena             |
| Tropical <i>japonica</i>  | Japan                     | 2545   | —         | RA4882    | Kotobuki mochi      |
| Tropical <i>japonica</i>  | Philippines               | 8244   | —         | RA4901    | Davao               |
| Tropical <i>japonica</i>  | Indonesia                 | 8261   | PI 584546 | RA4905    | Padi kasalle        |
| Tropical <i>japonica</i>  | Indonesia                 | 16428  | —         | RA5297    | Gundil kuning       |
| Tropical <i>japonica</i>  | Indonesia                 | 17757  | —         | RA5353    | Jambu               |
| Tropical <i>japonica</i>  | Maylasia                  | 19552  | —         | —         | Tassangih           |
| Tropical <i>japonica</i>  | Pakistan                  | 38698  | PI 584568 | RA4948    | Npe-844             |
| Tropical <i>japonica</i>  | Indonesia (West Java)     | 43325  | PI 584570 | RA4951    | Arias               |
| Tropical <i>japonica</i>  | Indonesia (Bali)          | 43372  | —         | RA4955    | Cicah beton         |
| Tropical <i>japonica</i>  | Indonesia (East Java)     | 43675  | —         | RA4988    | Trembese            |
| Tropical <i>japonica</i>  | Texas                     | 66756  | —         | RA4998    | Lemont              |
| Tropical <i>japonica</i>  | Philippines               | —      | Clr 12168 | RA5396    | Sinampaga selection |
| Tropical <i>japonica</i>  | Louisiana                 | —      | Clr 1344  | RA5045    | Fortuna             |
| Tropical <i>japonica</i>  | Philippines (introduced)  | —      | Clr 461   | RA5333    | Asse y pung         |
| Tropical <i>japonica</i>  | Thailand                  | —      | PI 597044 | RA5294    | Ku115               |

*Oryza* accessions used in this study with their voucher/accession numbers and countries of origin. Clr, cereal investigation; GRIN, Germplasm Resources Information Network; IRGC, International Rice GenBank Collection; PI, plant introduction; RA: rice accession numbers from the McCouch Laboratory, Cornell University, Ithaca, NY.

**Table S2. Overview of selective sweep regions predicted by two different methods**

| Region         | Population              | Chromosome | Start (kB) | End (kB) | Size (kB) | Method         | QTLs                                               |
|----------------|-------------------------|------------|------------|----------|-----------|----------------|----------------------------------------------------|
| <i>Chr8.1</i>  | <i>Japonica</i>         | 8          | 5,598      | 5,598    | 0.5       | CLR            |                                                    |
| <i>Chr8.2</i>  | <i>Indica</i>           | 8          | 20,828     | 21,326   | 498       | Diversity      | AWNLG, GRSH, GRYLD, SDDOR                          |
| <i>Chr8.3</i>  | <i>Indica, japonica</i> | 8          | 21,841     | 23,333   | 1,492     | Diversity      | AWNLG, GRNB, GRSH, GRYLD, PTHT, SDDOR, SPKNB, TINB |
| <i>Chr8.4</i>  | <i>Indica, japonica</i> | 8          | 23,445     | 24,448   | 1,003     | Diversity      | GRYLD, PTHT                                        |
| <i>Chr8.5</i>  | <i>Japonica</i>         | 8          | 24,932     | 26,138   | 1,208     | Diversity      |                                                    |
| <i>Chr8.6</i>  | <i>Japonica</i>         | 8          | 27,518     | 28,406   | 888       | Diversity      | FGRPCENT, GRNB                                     |
| <i>Chr10.1</i> | <i>Japonica</i>         | 10         | 3,115      | 3,116    | 0.5       | CLR            |                                                    |
| <i>Chr10.2</i> | <i>Indica, japonica</i> | 10         | 13,467     | 15,265   | 1,798     | Diversity      |                                                    |
| <i>Chr10.3</i> | <i>Indica</i>           | 10         | 15,264     | 16,053   | 789       | Diversity, CLR |                                                    |
| <i>Chr10.4</i> | <i>Indica</i>           | 10         | 18,070     | 18,462   | 392       | Diversity      | SDSPCENT                                           |
| <i>Chr10.5</i> | <i>Indica, japonica</i> | 10         | 20,656     | 22,342   | 1,686     | Diversity, CLR | PNLG, SDSPCENT                                     |
| <i>Chr12.1</i> | <i>Indica, japonica</i> | 12         | 1,419      | 2,835    | 1,417     | Diversity      | DTHD                                               |
| <i>Chr12.2</i> | <i>Indica, japonica</i> | 12         | 4,556      | 4,871    | 315       | Diversity, CLR |                                                    |
| <i>Chr12.3</i> | <i>Indica, japonica</i> | 12         | 5,535      | 5,735    | 200       | CLR            |                                                    |
| <i>Chr12.4</i> | <i>Japonica</i>         | 12         | 15,126     | 15,126   | 0.5       | CLR            |                                                    |
| <i>Chr12.5</i> | <i>Indica</i>           | 12         | 16,196     | 16,196   | 0.5       | CLR            |                                                    |
| <i>Chr12.6</i> | <i>Japonica</i>         | 12         | 22,102     | 22,102   | 0.5       | CLR            |                                                    |
| <i>Chr12.7</i> | <i>Japonica</i>         | 12         | 22,823     | 22,823   | 0.5       | CLR            |                                                    |
| <i>Chr12.8</i> | <i>Japonica</i>         | 12         | 23,176     | 23,176   | 0.5       | CLR            |                                                    |
| <i>Chr12.9</i> | <i>Indica, japonica</i> | 12         | 25,891     | 27,505   | 1,614     | Diversity, CLR | GRNB, HGRWT, PNLG, PTHT                            |

Candidate regions with overlapping signals for either of the populations or different methods were collapsed into one region. Note that regions showing evidence for both *indica* and *japonica* as well as multiple methods do not automatically imply that all groups show evidence for all tests within the same region. For example, region *chr12.12* shows evidence for all methods; however, the CLR signal was only found for tropical *japonica*. Fig. S2 contains the QTL abbreviations.

**Table S3. Maximum likelihood parameters for the four models (with and without SNPs in putative sweep regions) that we tested assuming symmetric migration**

| Model                       | $\eta_i$ | $\eta_j$ | $\tau$ | $\tau_2$ | $\tau_B$ | $\tau_{B2}$ | $m_{ir}$ | $m_{jr}$ | $m_{ij}$ |
|-----------------------------|----------|----------|--------|----------|----------|-------------|----------|----------|----------|
| With sweeps                 |          |          |        |          |          |             |          |          |          |
| <i>Japonica from indica</i> | 0.08     | 0.06     | 1.00   | 0.00     | 0.00     | 0.04        | 3.13     | 1.32     | 1.99     |
| <i>Indica from japonica</i> | 0.08     | 0.06     | 1.00   | 0.00     | 0.00     | 0.04        | 3.14     | 1.29     | 1.92     |
| <i>Indica first</i>         | 0.09     | 0.07     | 1.00   | 0.01     | 0.02     | 0.03        | 2.71     | 1.17     | 1.80     |
| <i>Japonica first</i>       | 0.07     | 0.07     | 1.00   | 0.01     | 0.02     | 0.03        | 3.69     | 1.24     | 2.15     |
| Without sweeps              |          |          |        |          |          |             |          |          |          |
| <i>Japonica from indica</i> | 0.09     | 0.07     | 1.00   | 0.00     | 0.00     | 0.04        | 3.84     | 1.57     | 2.16     |
| <i>Indica from japonica</i> | 0.07     | 0.07     | 1.00   | 0.00     | 0.00     | 0.07        | 5.07     | 2.01     | 2.35     |
| <i>Indica first</i>         | 0.11     | 0.10     | 1.00   | 0.00     | 0.01     | 0.01        | 3.51     | 1.41     | 1.59     |
| <i>Japonica first</i>       | 0.10     | 0.08     | 1.00   | 0.00     | 0.01     | 0.00        | 4.02     | 1.85     | 1.37     |

Maximum likelihood parameter estimates for the single- and double-founder domestication models tested in *daði*. All parameters were inferred by *daði*, although we fixed the *indica* and tropical *japonica* bottleneck population sizes to 1% of the *O. rufipogon* population size for all models.  $\tau_{B2}$  and  $\tau_2$  represent the length of time of the bottleneck and time thereafter for the two-population epoch. Likewise,  $\tau_B$  and  $\tau$  represent the length of the bottleneck and time thereafter during the three-population epoch. All models had symmetric migration in the three-population epoch. Symmetric migration between *O. rufipogon* and *indica* is represented by  $m_{ir}$ , migration between tropical *japonica* and *O. rufipogon* is represented by  $m_{jr}$ , and migration between *indica* and tropical *japonica* is indicated by  $m_{ij}$ .
